# Supplementary material for: Environmental Stability and Its Importance for the Emergence of Darwinian Evolution
Source: MDPI journal article supplement (doi:10.3390/life13101960), 2023-09-25
Supplement: s1 [file s1]

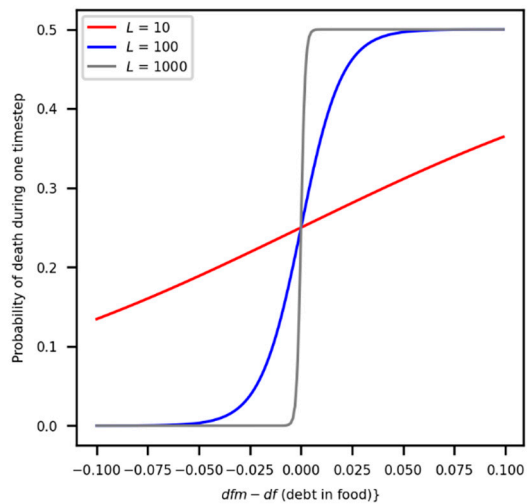

Figure S1: Probability of protocell death depending on food debt

```
import numpy as np
```

```
import matplotlib.pyplot as plt
```

```
#Number of timesteps:
```

```
T = 150
```

```
# Initial P
```

```
Pi = 100
```

```
Pa = 75
```

```
Pt = 15
```

```
S = 5
```

```
# function describing the evolution of P during the T timesteps:
```

```
x = np.arange(0,T)
```

```
y = Pa*np.sin(2*np.pi*x/Pt)+Pi
```

#Initial food amount in compartment

F = 1

# rate of food input in compartment

Fi = 0.2

# Concentration of molecules A1, ..., A4 in compartment

Axc = 100

# initial number of protocells:

N0 = 100

## Type of protocells and initial conditions (alive/dead)

Type1 = np.hstack([np.ones(int(np.floor(N0/2))),np.zeros(int(np.floor(N0/2))]))

Type2 = np.hstack([np.zeros(int(np.floor(N0/2))),np.ones(int(np.floor(N0/2))]))

#factor for death probability

L = 1000

# initial protocell volumes

V = 1\*np.ones(N0);

# volume threshold for division

VT = 2

# factor for volume growth of protocells

Gr = 0.005

# initial concentration of molecules A1, ..., A4 \*in protocells\*. To simplify, all these molecules have the same initial oncentrations A here.

A = 100\*np.ones(N0)

# factor of diffusion for food

$DF = 0.01$

# factor for food/energy conversion

$Fu = 1 \cdot 10^{(-5)}$

# factor for maintenance energy

$Fm = 0.001$

# Factor of diffusion for molecules A1, ..., A4.

$D = 0.1$

# initial rate of active uptake of molecule A, ..., A4.

$U = 10 \cdot \text{np.ones}(N0)$

# matrix containing all the info on all protocells. Each protocell corresponds to a line.

# columns in the matrix: protocell volume | 4 columns with A concentrations | 4 columns with rates of active A intake | State and type of the protocell (alive/dead) |

$\text{protocells} = \text{np.array}([V, A, A, A, A, U, U, U, U, \text{Type1}, \text{Type2}]).T$

for t in range(T):

# at each timestep, food input in the compartment

$F = F + Fi$

```

Fc_tot = 0

# value of P on timestep t

P = y[t]

# Initializing the matrix that will contain the daughter protocells. It has the same structure than the
matrix 'Cells'.

daughter = np.empty((0,11))

#for each active protocell:
for i in range(Cells.shape[0]):
    # if the protocell is active:
    if protocells[i,9] + protocells[i,10] > 0:
        # protocellular division and stochastic variations ("mutations") if volume superior to VT:
        if protocells[i,0] > VT:
            # defining the value of stochastic variation; it depends on the protocell type.
            if protocells[i,-2] > 0:
                stochC = stochC1;
            if protocells[i,-1] > 0:
                stochC = S;

# defining the mutations of the values of active uptake U1, ..., U4 for daughter protocells
mutations1 = list();
for j in range(5,9):
    X = np.random.normal(loc = 0, scale = stochC)
    if X < -Cells[i,j]:
        X = -Cells[i,j]
    mutations1.append(X)
mutations2 = list();
for j in range(5,9):
    X = np.random.normal(loc = 0, scale = stochC)
    if X < -Cells[i,j]:
        X = -Cells[i,j]

```

```

        mutations2.append(X)

        # defining the characteristics of the two daughter protocells. V = half the one of the
        mother protocell, same A concentrations, rates of active A uptakes with stochastic variation, same
        type.

        daughter = np.vstack([daughter,np.matrix([[Cells[i,0]/2,

                                                    protocells[i,1],Cells[i,2],Cells[i,3],Cells[i,4],

                                                    protocells[i,5]+mutations1[0],Cells[i,6]+mutations1[1],Cells[i,7]+mutations1[2],Cells[i,8]+mutations1[
                                                    3],Cells[i,-2],Cells[i,-1]],

                                                    [Cells[i,0]/2,

                                                    protocells[i,1],Cells[i,2],Cells[i,3],Cells[i,4],

                                                    protocells[i,5]+mutations2[0],Cells[i,6]+mutations2[1],Cells[i,7]+mutations2[2],Cells[i,8]+mutations2[
                                                    3],Cells[i,-2],Cells[i,-1]]]]));

        # mother protocell disappears

        protocells[i,-2] = 0
        protocells[i,-1] = 0

        # otherwise, if no division:
    else:
        V_i = protocells[i,0]

        # entry of food in the protocell through diffusion:

        Fc = DF*F*V_i**(2/3)

        #adding this amount to the total amount of food consumed by all protocells

        Fc_tot = Fc_tot + Fc

        #change of A1, ..., A4 concentrations in the protocell.

        for j in range(1,5):

            Ai = protocells[i,j]

            protocells[i,j] = Ai + (D*(Axc-Ai)+Cells[i,j+4])/V_i**(1/3)

        # Energy required for maintenance

        F_maint = Fm*V_i

        # Energy required for active uptake of molecules A1, ..., A4 (proportional to sum of U
        values)

```

```

F_U = np.sum(Cells[i,5:9])*Fu

# if there is not enough energy for maintenance and active intake, the protocell has a
probability to die.

if np.random.rand() < 0.5*(1-1/(1+np.exp(-L*(Fc-F_maint-F_U)))):

    protocells[i,-1] = 0;

    protocells[i,-2] = 0;

else:

# food that remains for growth:

    if F_maint + F_U < Fc:

        F_growth = Fc - F_maint - F_U

# Influence of P on catalyst molecule

        if P < 50:

            Mol = protocells[i,1]

        if P >= 50 and P < 100:

            Mol = protocells[i,2]

        if P >= 100 and P < 150:

            Mol = protocells[i,3];

        if P >= 150:

            Mol = protocells[i,4];

# Protocell growth

        protocells[i,0] = V_i + Gr*(Mol**2)*F_growth

        #the molecules A are then diluted due to growth:

        for j in range(1,5):

            protocells[i,j] = protocells[i,j]*V_i/Cells[i,0]

#### adding daughter protocells

        protocells = np.vstack([Cells,daughter])

# computing the amount of food remaining in the compartment at the end of the timestep

        if Fc_tot > F:

```

$$F = 0$$

else:

$$F = F - F_{c\_tot}$$
